# Supplementary material for: The Serum Cell-Free microRNA Expression Profile in MCTD, SLE, SSc, and RA Patients
Source: PubMed Central journal article supplement (PMC7020053; doi:10.3390/jcm9010161), 2020-01-07
Supplement: jcm-09-00161-s001.pdf [file jcm-09-00161-s001.pdf]

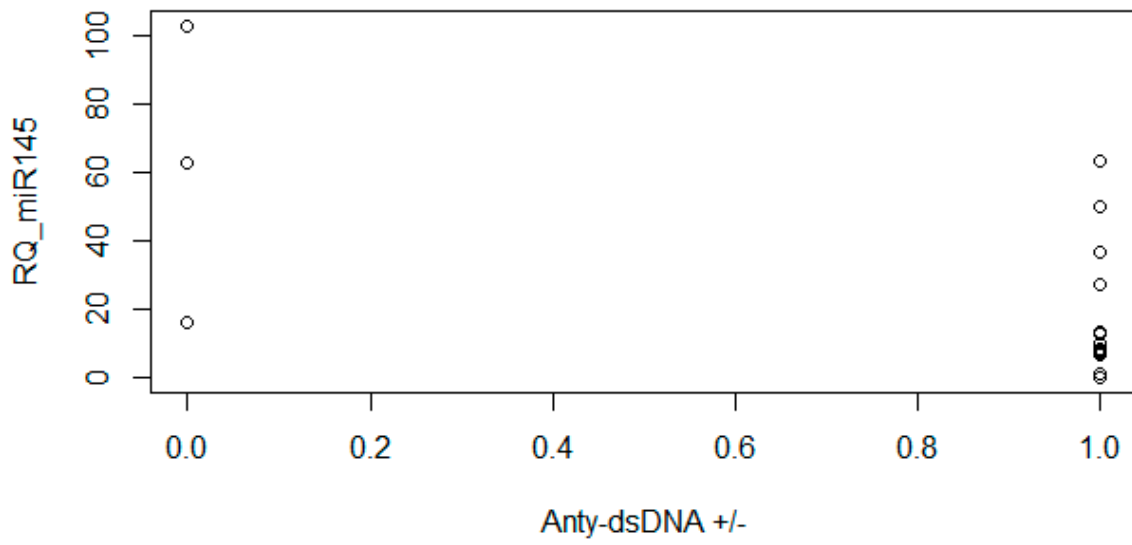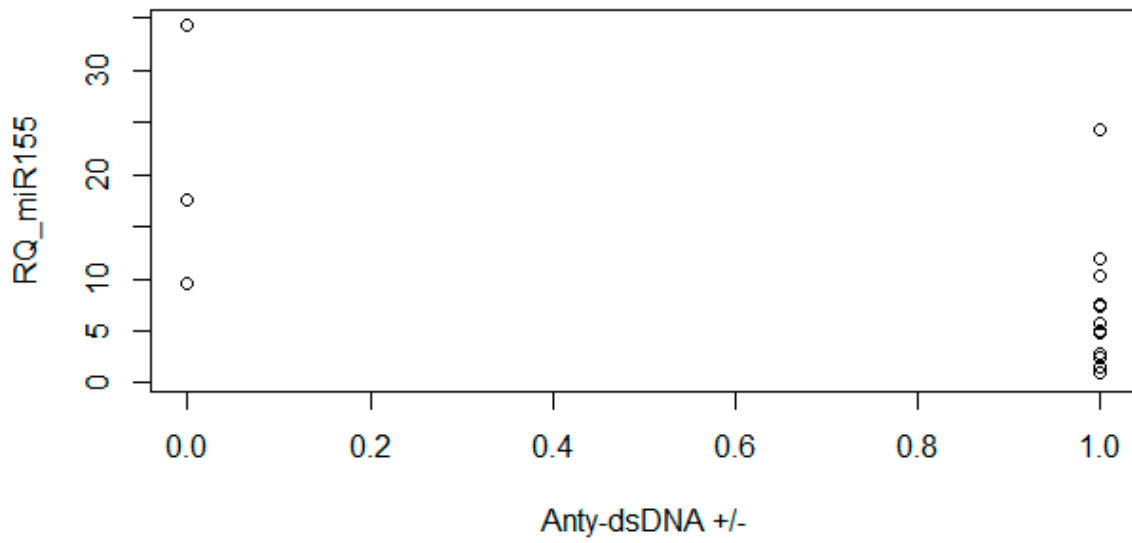

**Figure S1.** Negative Correlation between miRNAs: miR145 and miR155 serum expression levels and Anty-dsDNA antibody presence in SLE patients.
